# Supplementary material
Source: PubMed Central journal article supplement (PMC3821480)
Supplement: etj-0001-0176-s01.pdf [file etj-0001-0176-s01.pdf]

## Erratum

---

In the article 'Side Effects of Anti-Thyroid Drugs and Their Impact on the Choice of Treatment for Thyrotoxicosis in Pregnancy' by Taylor and Vaidya [Eur Thyroid J 2012;1:176–185], the sentence in the right column on line 1, p. 179: 'Furthermore, there has been a reported case of aplasia cutis secondary to PTU exposure during pregnancy and choanal atresia [37].' should correctly read: 'Furthermore, there has been a reported case of choanal atresia secondary to PTU exposure during pregnancy [37].'
